# Supplementary material for: A study protocol for risk stratification in children with concussion (RSiCC): Theoretical framework, design, and methods
Source: PubMed Central journal article supplement (PMC11257289; doi:10.1371/journal.pone.0306399), 2024-07-18
Supplement: pone.0306399.s001.pdf [file pone.0306399.s001.pdf]

# APPENDIX A

## Demographics

---

Age

---

Height in inches

---

Weight in pounds

---

BMI

---

---

Sex assigned at birth

Female

Male

---

Ethnicity

Non-Hispanic/Non-Latino

Hispanic/Latino

---

Race

White

Black or African  
American

Asian

American Indian or  
Alaska Native

Native Hawaiian or  
Pacific Islander

Unknown or Not  
Reported

---

Health Insurance

PPO

HMO

Self Pay

Military

Medicaid

---

Area Deprivation  
Index\*

1

2

3

4

5

6

7

8

9

10

---

\*Visit <https://www.neighborhoodatlas.medicine.wisc.edu/mapping> to determine the ADI based on the participant's home address

## Past Medical History

---

1. I am healthy with no medical problems, past or present.  Yes  No

*If "Yes", skip to question 3*

2. I have had problems with (please select all that apply and list the problems):

- Eye or eyesight \_\_\_\_\_
- Ear, nose and throat \_\_\_\_\_
- Thyroid or other endocrine \_\_\_\_\_
- Heart or lung \_\_\_\_\_
- Abdominal or urinary \_\_\_\_\_
- Musculoskeletal \_\_\_\_\_
- Nervous system \_\_\_\_\_
- Other medical problems \_\_\_\_\_

---

3. In your medical history do you have the following conditions? For conditions that you do have, indicate whether you have had prior treatment for the condition.

| <i>Condition</i>                                                                 | <i>Prior Treatment?</i>      |                             |
|----------------------------------------------------------------------------------|------------------------------|-----------------------------|
| <input type="checkbox"/> Headache                                                | <input type="checkbox"/> Yes | <input type="checkbox"/> No |
| <input type="checkbox"/> Migraine                                                | <input type="checkbox"/> Yes | <input type="checkbox"/> No |
| <input type="checkbox"/> Family history of migraine                              |                              |                             |
| <input type="checkbox"/> Motion sickness                                         | <input type="checkbox"/> Yes | <input type="checkbox"/> No |
| <input type="checkbox"/> Learning disabilities and/or developmental disabilities | <input type="checkbox"/> Yes | <input type="checkbox"/> No |
| Please specify any learning and/or developmental disabilities: _____             |                              |                             |
| <input type="checkbox"/> Chronic Fatigue                                         | <input type="checkbox"/> Yes | <input type="checkbox"/> No |
| <input type="checkbox"/> Sleep disorder                                          | <input type="checkbox"/> Yes | <input type="checkbox"/> No |
| <input type="checkbox"/> Attention Deficit Hyperactivity Disorder (ADHD/ADD)     | <input type="checkbox"/> Yes | <input type="checkbox"/> No |
| <input type="checkbox"/> Seizure disorder                                        | <input type="checkbox"/> Yes | <input type="checkbox"/> No |
| <input type="checkbox"/> Anxiety                                                 | <input type="checkbox"/> Yes | <input type="checkbox"/> No |
| <input type="checkbox"/> Depression                                              | <input type="checkbox"/> Yes | <input type="checkbox"/> No |
| <input type="checkbox"/> Other psych-mental health disorder                      | <input type="checkbox"/> Yes | <input type="checkbox"/> No |

---

## Psycho-Social History

### HOME

Who lives at home with you? Please select all that apply.

- |                                           |                                     |
|-------------------------------------------|-------------------------------------|
| <input type="checkbox"/> Mom              | <input type="checkbox"/> Dad        |
| <input type="checkbox"/> Parent's Partner | <input type="checkbox"/> Sibling(s) |
| <input type="checkbox"/> Extended Family  | <input type="checkbox"/> Friends    |
| <input type="checkbox"/> Other: _____     |                                     |

Do you have your own room?

- Yes  No

### EDUCATION

Please select your school type

- |                                                      |                                                  |
|------------------------------------------------------|--------------------------------------------------|
| <input type="checkbox"/> Public School – Traditional | <input type="checkbox"/> Public School – Charter |
| <input type="checkbox"/> Private School              | <input type="checkbox"/> Home school             |
| <input type="checkbox"/> Virtual school              | <input type="checkbox"/> Other:                  |

Please select your school schedule:

- Traditional Calendar  Year-Round Calendar

Do you enjoy school?

- Yes  No

### EATING AND EXERCISE

How many meals do you eat a day?

- |                            |                                    |
|----------------------------|------------------------------------|
| <input type="checkbox"/> 1 | <input type="checkbox"/> 3         |
| <input type="checkbox"/> 2 | <input type="checkbox"/> 4 or more |

How many sugar sweetened beverages (SSB) do you drink a day? (e.g. non-diet soft drinks/sodas, flavored juice drinks, sports drinks, sweet tea, flavored coffee drinks, etc.)

- |                            |                                    |
|----------------------------|------------------------------------|
| <input type="checkbox"/> 0 | <input type="checkbox"/> 3         |
| <input type="checkbox"/> 1 | <input type="checkbox"/> 4 or more |
| <input type="checkbox"/> 2 |                                    |

How many caffeinated beverages do you drink in a day? (e.g.: coffee, espresso drinks, tea, energy drinks, some sodas, etc.)

- |                            |                                    |
|----------------------------|------------------------------------|
| <input type="checkbox"/> 0 | <input type="checkbox"/> 3         |
| <input type="checkbox"/> 1 | <input type="checkbox"/> 4 or more |
| <input type="checkbox"/> 2 |                                    |

Please select your general activity level:

- Sedentary (little or no exercise)
- Lightly Active (exercise/sports 1-3 days/week)
- Moderately Active (exercise/sports 3-5 days/week)
- Very Active (exercise/sports 6-7 days/week)
- Extra Active (exercise/sports 2 or more times per day, or exercise/sports daily and a physical job)

---

**ACTIVITIES/SOCIAL**

- On average do you feel like the activities you participate in are fun?  Yes  No
- Do you participate in activities with friends?  In school  
 Outside of school  
 Both in school and outside of school  
 I do not participate in activities with friends
- What do you do **most often** with your free time?  Hang out with friends  
 Hang out with family  
 Hang out by myself – have “me” time

---

**SAFETY**

- Do you always wear a seatbelt in the car?  Yes  No
- Do you drive?  Yes  No
- If you DO drive:*
- What do you drive? Please select all that apply.  Car  
 Motorcycle  
 Motorized bike  
 Motorized scooter  
 Motorized wheeled toy  
 Golf cart
- Have you ever had a motor vehicle accident as the driver?  Yes  No
- Have you sent a text message while driving?  Yes  No
- Have you ever had more friends in the car than seat belts while driving?  Yes  No
- Have you ever driven while tired?  Yes  No
- Have you ever driving while stressed or upset?  Yes  No
- Have you driven since you had a concussion?  Yes  No
-
