# Supplementary material for: A study protocol for risk stratification in children with concussion (RSiCC): Theoretical framework, design, and methods
Source: PubMed Central journal article supplement (PMC11257289; doi:10.1371/journal.pone.0306399), 2024-07-18
Supplement: pone.0306399.s002.pdf [file pone.0306399.s002.pdf]

Anterograde amnesia? Are there any events just after the injury that the person has no memory of, even briefly?  Yes  No

Loss of consciousness?  Yes  No

Early signs that appeared following the injury

|                                                   |                                                   |
|---------------------------------------------------|---------------------------------------------------|
| <input type="checkbox"/> Appears dazed or stunned | <input type="checkbox"/> Is confused about events |
| <input type="checkbox"/> Answers questions slowly | <input type="checkbox"/> Repeats questions        |
| <input type="checkbox"/> Forgetful (recent info)  | <input type="checkbox"/> None of the above        |

Were seizures observed?  Yes  No

Seizure detail (*if applicable*):

Was the person dizzy immediately following injury?  Yes  No

Ate/Drank anything other than water within one hour following injury?  Yes  No

Emergency department referral at time of injury?  Yes  No

**If ED referral:**

Glasgow Coma Scale Score in ED:  13  14  15

Pupil Response:  Normal  Abnormal

Imaging studies?  Yes  No

**If yes to imaging studies:**

Imaging study type (check all that apply and provide notes):  CT: \_\_\_\_\_  EEG: \_\_\_\_\_  
 MRI: \_\_\_\_\_  Other: \_\_\_\_\_

Is there evidence of an intercranial skull fracture?  Yes  No

Type of injury (from imaging):  SDH – subdural  FX – fracture  
 EDH – epidural  NAICP – concussion  
 SAH – subarachnoid  Other: \_\_\_\_\_  
 DAI – diffuse axonal
