# Supplementary material for: A study protocol for risk stratification in children with concussion (RSiCC): Theoretical framework, design, and methods
Source: PubMed Central journal article supplement (PMC11257289; doi:10.1371/journal.pone.0306399), 2024-07-18
Supplement: pone.0306399.s003.pdf [file pone.0306399.s003.pdf]

## APPENDIX C

NOTE: The items highlighted were incorporated as supplementary academic performance measures for this study and are not part of Gioia et al's CLASS-3.

### Academic Performance – CLASS-3 Adapted – *Initial Study Visit*

|                                                                                                                                   |                                        |                                 |                                     |                                         |                                  |                            |                            |
|-----------------------------------------------------------------------------------------------------------------------------------|----------------------------------------|---------------------------------|-------------------------------------|-----------------------------------------|----------------------------------|----------------------------|----------------------------|
| General (pre-injury) school performance (Select ALL grades that apply):                                                           | <input type="checkbox"/> A's           | <input type="checkbox"/> B's    | <input type="checkbox"/> C's        | <input type="checkbox"/> D's            | <input type="checkbox"/> E's/F's |                            |                            |
| Since your concussion, how concerned are you about this injury affecting your school learning and performance? Please select ONE: | <input type="checkbox"/> Not concerned | <input type="checkbox"/> Mildly | <input type="checkbox"/> Moderately | <input type="checkbox"/> Very concerned |                                  |                            |                            |
| Have you returned to learning since your concussion?                                                                              | <input type="checkbox"/> Yes           | <input type="checkbox"/> No     |                                     |                                         |                                  |                            |                            |
| If yes, how many days was it before you could return to learn?                                                                    | <input type="checkbox"/> 0             | <input type="checkbox"/> 1      | <input type="checkbox"/> 2          | <input type="checkbox"/> 3              | <input type="checkbox"/> 4       | <input type="checkbox"/> 5 | <input type="checkbox"/> 6 |
| How many missed class days have you had SINCE your injury?                                                                        | <input type="checkbox"/> 0             | <input type="checkbox"/> 1      | <input type="checkbox"/> 2          | <input type="checkbox"/> 3              | <input type="checkbox"/> 4       | <input type="checkbox"/> 5 | <input type="checkbox"/> 6 |
| Have you returned to play since your concussion?                                                                                  | <input type="checkbox"/> Yes           | <input type="checkbox"/> No     |                                     |                                         |                                  |                            |                            |
| If yes, how many days was it before you could return to play?                                                                     | <input type="checkbox"/> 0             | <input type="checkbox"/> 1      | <input type="checkbox"/> 2          | <input type="checkbox"/> 3              | <input type="checkbox"/> 4       | <input type="checkbox"/> 5 | <input type="checkbox"/> 6 |
| What are your current grades (Select ALL grades that apply):                                                                      | <input type="checkbox"/> A's           | <input type="checkbox"/> B's    | <input type="checkbox"/> C's        | <input type="checkbox"/> D's            | <input type="checkbox"/> E's/F's |                            |                            |

## Academic Performance – CLASS-3 Adapted – *Follow-up Study Visit*

Who at your school is planning or implementing your concussion-related supports? (Select ALL who apply)

- School Nurse / Health Aide
- Guidance Counselor
- Principal / Asst. Principal
- School Psychologist
- Athletic Trainer
- Homeroom Teacher
- Special Education Teacher
- Other Teacher
- Coach
- Other
- No one (none of the above)

Since your last visit, how concerned are you about this injury affecting your school learning and performance? Please select ONE:

- Not concerned
- Mildly
- Moderately
- Very concerned

Have your grades been affected (worsened) since your last visit?

Yes

No

Think about the past few days and tell us whether the following school problems are worse because of your concussion.

|                                          | Not worse/Not a problem  | A little worse           | Somewhat worse           | A lot worse              |
|------------------------------------------|--------------------------|--------------------------|--------------------------|--------------------------|
| Difficulty taking notes                  | <input type="checkbox"/> | <input type="checkbox"/> | <input type="checkbox"/> | <input type="checkbox"/> |
| Difficulty understanding new material    | <input type="checkbox"/> | <input type="checkbox"/> | <input type="checkbox"/> | <input type="checkbox"/> |
| In class, work taking longer             | <input type="checkbox"/> | <input type="checkbox"/> | <input type="checkbox"/> | <input type="checkbox"/> |
| Homework taking longer                   | <input type="checkbox"/> | <input type="checkbox"/> | <input type="checkbox"/> | <input type="checkbox"/> |
| Difficulty studying for tests or quizzes | <input type="checkbox"/> | <input type="checkbox"/> | <input type="checkbox"/> | <input type="checkbox"/> |
| Trouble remembering what was studied     | <input type="checkbox"/> | <input type="checkbox"/> | <input type="checkbox"/> | <input type="checkbox"/> |
| Trouble reading                          | <input type="checkbox"/> | <input type="checkbox"/> | <input type="checkbox"/> | <input type="checkbox"/> |
| Easily distracted during class work      | <input type="checkbox"/> | <input type="checkbox"/> | <input type="checkbox"/> | <input type="checkbox"/> |
| Easily distracted during homework        | <input type="checkbox"/> | <input type="checkbox"/> | <input type="checkbox"/> | <input type="checkbox"/> |

|                                            | Not<br>worse/Not a<br>problem | A little worse           | Somewhat<br>worse        | A lot worse              |
|--------------------------------------------|-------------------------------|--------------------------|--------------------------|--------------------------|
| Headaches interfering with classwork       | <input type="checkbox"/>      | <input type="checkbox"/> | <input type="checkbox"/> | <input type="checkbox"/> |
| Headaches interfering with homework        | <input type="checkbox"/>      | <input type="checkbox"/> | <input type="checkbox"/> | <input type="checkbox"/> |
| Tiring easily during the school day        | <input type="checkbox"/>      | <input type="checkbox"/> | <input type="checkbox"/> | <input type="checkbox"/> |
| Tiring easily during homework              | <input type="checkbox"/>      | <input type="checkbox"/> | <input type="checkbox"/> | <input type="checkbox"/> |
| Easily bothered by lights/screens or noise | <input type="checkbox"/>      | <input type="checkbox"/> | <input type="checkbox"/> | <input type="checkbox"/> |

What is currently stressful or overwhelming for you because of your concussion? Indicate your level of stress.

|                                                                | Not<br>stressful         | A little<br>stressful    | Moderately<br>stressful  | Very<br>stressful        |
|----------------------------------------------------------------|--------------------------|--------------------------|--------------------------|--------------------------|
| Missing time with friends and/or social activities             | <input type="checkbox"/> | <input type="checkbox"/> | <input type="checkbox"/> | <input type="checkbox"/> |
| Not being allowed to play sports/recreation                    | <input type="checkbox"/> | <input type="checkbox"/> | <input type="checkbox"/> | <input type="checkbox"/> |
| Not having enough support from teachers                        | <input type="checkbox"/> | <input type="checkbox"/> | <input type="checkbox"/> | <input type="checkbox"/> |
| Not having enough support at home from<br>parents/siblings     | <input type="checkbox"/> | <input type="checkbox"/> | <input type="checkbox"/> | <input type="checkbox"/> |
| More stressed out/overwhelmed with the<br>schoolwork piling up | <input type="checkbox"/> | <input type="checkbox"/> | <input type="checkbox"/> | <input type="checkbox"/> |
| Stressed out about your grades dropping                        | <input type="checkbox"/> | <input type="checkbox"/> | <input type="checkbox"/> | <input type="checkbox"/> |

Because of your concussion, have you been having any NEW or WORSENING trouble in any of the following classes?

|                               | No different             | A little worse           | Somewhat<br>worse        | A lot worse              | Not taking               |
|-------------------------------|--------------------------|--------------------------|--------------------------|--------------------------|--------------------------|
| Math                          | <input type="checkbox"/> | <input type="checkbox"/> | <input type="checkbox"/> | <input type="checkbox"/> | <input type="checkbox"/> |
| Reading/English/Language Arts | <input type="checkbox"/> | <input type="checkbox"/> | <input type="checkbox"/> | <input type="checkbox"/> | <input type="checkbox"/> |
| Science                       | <input type="checkbox"/> | <input type="checkbox"/> | <input type="checkbox"/> | <input type="checkbox"/> | <input type="checkbox"/> |
| History/Social Studies        | <input type="checkbox"/> | <input type="checkbox"/> | <input type="checkbox"/> | <input type="checkbox"/> | <input type="checkbox"/> |
| Foreign Language              | <input type="checkbox"/> | <input type="checkbox"/> | <input type="checkbox"/> | <input type="checkbox"/> | <input type="checkbox"/> |

Please check one column for each of the following supports to indicate which supports you need and/or are receiving **because of your concussion**.

|                                                              | Do you need it?          |                          |                          | Do you have it?          |                          |                          |                          |
|--------------------------------------------------------------|--------------------------|--------------------------|--------------------------|--------------------------|--------------------------|--------------------------|--------------------------|
|                                                              | No                       | Yes                      | I don't know             | No                       | Yes, but not enough      | Yes                      | I don't know             |
| Shortened day                                                | <input type="checkbox"/> | <input type="checkbox"/> | <input type="checkbox"/> | <input type="checkbox"/> | <input type="checkbox"/> | <input type="checkbox"/> | <input type="checkbox"/> |
| Shorter classes                                              | <input type="checkbox"/> | <input type="checkbox"/> | <input type="checkbox"/> | <input type="checkbox"/> | <input type="checkbox"/> | <input type="checkbox"/> | <input type="checkbox"/> |
| Rest breaks                                                  | <input type="checkbox"/> | <input type="checkbox"/> | <input type="checkbox"/> | <input type="checkbox"/> | <input type="checkbox"/> | <input type="checkbox"/> | <input type="checkbox"/> |
| Extra time to complete work                                  | <input type="checkbox"/> | <input type="checkbox"/> | <input type="checkbox"/> | <input type="checkbox"/> | <input type="checkbox"/> | <input type="checkbox"/> | <input type="checkbox"/> |
| No tests                                                     | <input type="checkbox"/> | <input type="checkbox"/> | <input type="checkbox"/> | <input type="checkbox"/> | <input type="checkbox"/> | <input type="checkbox"/> | <input type="checkbox"/> |
| Modified tests (shorted length, more time, no screens, etc.) | <input type="checkbox"/> | <input type="checkbox"/> | <input type="checkbox"/> | <input type="checkbox"/> | <input type="checkbox"/> | <input type="checkbox"/> | <input type="checkbox"/> |
| Current work reduced or waived                               | <input type="checkbox"/> | <input type="checkbox"/> | <input type="checkbox"/> | <input type="checkbox"/> | <input type="checkbox"/> | <input type="checkbox"/> | <input type="checkbox"/> |
| Makeup work reduced or waived                                | <input type="checkbox"/> | <input type="checkbox"/> | <input type="checkbox"/> | <input type="checkbox"/> | <input type="checkbox"/> | <input type="checkbox"/> | <input type="checkbox"/> |
| Coordinated plan for makeup work                             | <input type="checkbox"/> | <input type="checkbox"/> | <input type="checkbox"/> | <input type="checkbox"/> | <input type="checkbox"/> | <input type="checkbox"/> | <input type="checkbox"/> |
| Other:                                                       | <input type="checkbox"/> | <input type="checkbox"/> | <input type="checkbox"/> | <input type="checkbox"/> | <input type="checkbox"/> | <input type="checkbox"/> | <input type="checkbox"/> |

Have you returned to learning since your concussion?  Yes  No

If yes, how many days was it before you could return to learn? \_\_\_\_\_

How many missed class days have you had SINCE your injury? \_\_\_\_\_

Have you returned to play since your concussion?  Yes  No

If yes, how many days was it before you could return to play? \_\_\_\_\_

What are your current grades (Select ALL grades that apply):  A's  B's  C's  D's  E's/F's
